# Supplementary material for: Evaluation of DNA Methylation Profiles of LINE-1, Alu and Ribosomal DNA Repeats in Human Cell Lines Exposed to Radiofrequency Radiation
Source: Preprints.org preprint supplement (doi:10.20944/preprints202304.1028.v1), 2023-04-27
Supplement: Supplementary file 1 [file Supplementary Captions.docx]

**Figure S1**. **DNAm calibration curves for rDNA, LINE1 and Alu targets.** Plots reporting DNAm profiles for rDNA, LINE1 and Alu amplicons assessed using calibrator samples at increasing DNAm percentages (0%, 25%, 50%, 75%, 100%). Calibration curves are obtained through linear regression between measured DNAm levels and expected ones. r-value = Spearman correlation coefficient; p-value = linear regression statistical significance coefficient.

**Figure S2**. **Genomic sequences of rDNA, LINE-1 and Alu amplicons.** List of genomic sequences amplified by rDNA, LINE-1 and Alu amplicons assayed through target-bisulfite sequencing. CpGs are highlighted and identified via their relative position within each amplicon.

**Table S1. Differential DNAm analysis statistics.** For each RE target, the table reports delta DNAm and t-test p-value between cell lines (BE(2)C, HeLa, SH-SY5Y) exposed to radiofrequency or to sham.

**Table S2. Differential DNAm epihaplotype diversity statistics.** For each RE target, the table report epihaplotype diversity index (Shannon Index) delta and t-test p-value between cell lines (BE(2)C, HeLa, SH-SY5Y) exposed to radiofrequency or to sham.

**Table S3. List of bisulfite-specific primers.**
