# Supplementary material for: Evaluation of DNA Methylation Profiles of LINE-1, Alu and Ribosomal DNA Repeats in Human Cell Lines Exposed to Radiofrequency Radiation
Source: Preprints.org preprint supplement (doi:10.20944/preprints202304.1028.v1), 2023-04-27
Supplement: Supplementary file 2 [file Table S1_DNAm_Statistics.xlsx]

## Sheet: 18S
CpG	Delta_SH-SY5Y	pVal_SH-SY5Y	Delta_BE(2)C	pVal_BE(2)C	Delta_HeLa	pVal_HeLa
X4	-0.0160749	0.105672	-0.00237157	0.812498	-0.00900356	0.203945
X24	0.0358982	0.46522	-0.00841248	0.697955	0.0236993	0.220092
X30	0.0448789	0.252901	0.00307092	0.875961	0.0117099	0.444855
X45	0.0669906	0.158359	0.0120008	0.562363	0.0106609	0.643361
X52	0.0168917	0.555477	-0.00404521	0.813762	0.00301395	0.787017
X72	0.0741279	0.18691	-0.0104471	0.514744	0.0155181	0.278248
X75	0.0433274	0.436984	-0.00129291	0.957341	0.00931444	0.552074
X85	0.0422959	0.454495	-0.0110581	0.580727	0.00323751	0.821519
X104	0.06668	0.261887	-0.0144547	0.330881	-0.0095893	0.190717
X108	0.0595852	0.361307	-0.00670059	0.766305	0.00616042	0.546933
X117	0.069907	0.332254	-0.00460658	0.851016	0.00851696	0.590582
X120	0.0897546	0.11049	-0.00261652	0.899539	-0.00234966	0.9075
X123	0.0876181	0.177593	-0.00653776	0.801338	0.0116909	0.551917
X128	0.0923116	0.109439	-0.00644599	0.785251	0.0158663	0.139997
X135	0.0794723	0.0412823	-0.0107061	0.476428	0.0156759	0.447415
X139	0.0725159	0.25527	-0.0091851	0.684372	0.010114	0.560831
X143	0.080132	0.134323	-0.0132601	0.489662	0.0111261	0.564133
X148	0.080322	0.225655	0.010434	0.564678	0.0129686	0.47093
X173	0.0772767	0.265633	-0.013913	0.612944	0.0239044	0.0629672
X176	0.0737196	0.109954	-0.0175763	0.568134	0.0193912	0.236709
X179	0.0869333	0.0424507	-0.00728839	0.803926	0.00158867	0.921817
X183	0.0782395	0.168817	-0.00589901	0.830223	0.0238086	0.240592
X190	0.0707704	0.0428229	-0.00184479	0.935296	0.0133781	0.228478
X194	0.0715109	0.161152	-0.0104663	0.721347	0.0147155	0.201651
X200	0.104206	0.0685558	-0.00285409	0.917702	0.0339077	0.0533864
X215	0.0681983	0.33604	-0.00139962	0.963249	0.0134817	0.168691
X242	0	NA	0	NA	0	NA

## Sheet: 28S
CpG	Delta_SH-SY5Y	pVal_SH-SY5Y	Delta_BE(2)C	pVal_BE(2)C	Delta_HeLa	pVal_HeLa
X29	-0.01636	0.0875493	-0.000604018	0.950275	-0.0217389	0.0109922
X56	0.0108939	0.553266	-0.00445747	0.603517	-0.00816603	0.36541
X62	0.00579949	0.340276	-0.00554259	0.397043	-0.0179596	0.090133
X72	-0.00540835	0.593297	-0.0163473	0.284947	-0.0254589	0.00247904
X78	0.011835	0.146152	-0.00406686	0.488489	-0.0190239	0.0521407
X81	0.00430117	0.429566	-0.0054158	0.545072	-0.0184292	0.0684621
X83	0.00669174	0.340156	-0.000726816	0.939758	-0.0178498	0.0497855
X86	-0.00201357	0.82314	-0.00983606	0.394096	-0.0168506	0.123247
X93	0.0201507	0.293507	0.000145117	0.986009	-0.0147968	0.128276
X99	0.0093842	0.517965	-0.00646209	0.302576	-0.0151064	0.0310645
X110	0.0124965	0.290114	0.000417914	0.949257	-0.00572476	0.590683
X116	0.00948455	0.687623	0.00223488	0.817509	-0.00883395	0.511515
X128	0.0217541	0.283242	-0.00188136	0.822161	-0.00316251	0.717167
X153	0.0215744	0.258642	-0.0110396	0.230657	-0.000964907	0.924108
X157	0.0123	0.452257	-0.0124524	0.0776675	-0.0117082	0.347997
X160	0.0037161	0.859448	-0.0177875	0.176159	-0.0100136	0.407311
X163	0.0146106	0.309613	-0.00874918	0.217726	-0.0101571	0.256396
X170	0.024595	0.311371	-0.0120633	0.0652057	-0.0115807	0.0924466
X179	0.0181688	0.214172	-0.0126704	0.10605	-0.0100016	0.322819
X183	0.0195752	0.23717	-0.00844882	0.246936	-0.0131116	0.164349
X195	0.0166701	0.509532	-0.00851084	0.134871	-0.0157395	0.174939
X197	0.0146573	0.341524	-0.0183408	0.00973543	-0.0140499	0.248003
X202	0.0223564	0.102875	-0.0140037	0.191983	-0.0118211	0.26116
X205	0.0165571	0.326938	-0.0145103	0.0199145	-0.0175581	0.165064
X207	0.0118075	0.296171	-0.0152559	0.0528279	-0.0175763	0.114525
X212	0.0104683	0.580152	-0.012896	0.0555119	-0.0147159	0.204385
X220	0.0368922	0.0651781	-0.00974114	0.162931	-0.00980097	0.397608
X223	0.00551089	0.730042	-0.0133438	0.151996	-0.005288	0.604252
X246	0.0107223	0.468429	-0.0166693	0.184207	-0.00850379	0.456747
X249	-0.00170018	0.918082	-0.010606	0.226323	-0.012891	0.233441

## Sheet: Alu
CpG	Delta_SH-SY5Y	pVal_SH-SY5Y	Delta_BE(2)C	pVal_BE(2)C	Delta_HeLa	pVal_HeLa
X26	0.00842387	0.110408	-0.00229842	0.841712	0.00143196	0.873045
X30	0.00837045	0.271186	-0.0130297	0.35939	0.00382385	0.532373
X38	0.00249292	0.871461	-0.0194232	0.108259	0.00782634	0.384246
X40	0.0183929	0.163474	-0.032226	0.106202	-0.0047132	0.696477
X42	-0.00368692	0.678131	-0.000903737	0.94511	0.00581386	0.70488
X62	-0.00174161	0.753482	-0.00842355	0.240135	-0.0175254	0.0977492
X84	0.0193616	0.361244	-0.00390825	0.745741	-0.000406992	0.971819
X94	0.010445	0.545915	0.0111615	0.323577	0.00779838	0.535963
X101	0.0171808	0.200078	-0.00986236	0.543573	0.00428806	0.538984
X118	0.014149	0.418663	0.00483434	0.746486	-0.00598118	0.0389787
X124	-0.000776834	0.953904	-0.0121491	0.477455	0.0152977	0.253346
X126	0.0166332	0.423005	0.0156664	0.367267	-0.00581224	0.70394

## Sheet: LINE-1
CpG	Delta_SH-SY5Y	pVal_SH-SY5Y	Delta_BE(2)C	pVal_BE(2)C	Delta_HeLa	pVal_HeLa
X27	0.0196521	0.373938	0.00640128	0.788578	0.0107944	0.389692
X34	0.0337539	0.185977	-0.0175659	0.478293	0.0180107	0.199007
X37	0.0152477	0.431228	-0.000183063	0.992133	0.0155223	0.373208
X49	0.0228505	0.214049	-0.0292166	0.426819	0.022911	0.0574188
X61	0.0134407	0.125973	-0.00892196	0.700257	-0.004696	0.668042
X70	0.0111478	0.582312	0.00437235	0.72746	0.0187289	0.0332173
X85	0.00922974	0.516602	-0.0118952	0.444517	0.00648067	0.636096
X99	0.0175874	0.326856	-0.00206601	0.899136	0.0118577	0.151088
X103	0.0181725	0.149594	-0.0228241	0.357033	0.017622	0.0546662
X123	0.0148185	0.397758	-0.0056442	0.562497	0.0271727	0.0833048
X149	0.0231957	0.200783	-0.0325893	0.232995	0.00642149	0.500798
X173	0.0192474	0.271129	-0.0198442	0.477849	0.00849581	0.48339
X183	0.0167732	0.184964	-0.00844662	0.694125	0.0173298	0.0277458
X188	0.0083611	0.433256	-0.000460045	0.98189	0.0154716	0.285119
X190	0.0225103	0.146334	-0.0215924	0.218046	0.022275	0.00794527
X194	0.016401	0.334767	-0.00871896	0.629692	0.0167541	0.0958019
X199	0.0133034	0.477104	-0.0244538	0.233672	0.0160066	0.222945
X217	0.00933914	0.530278	-0.0215654	0.210495	0.0150213	0.00959121

## Sheet: RiboProm1
CpG	Delta_SH-SY5Y	pVal_SH-SY5Y	Delta_BE(2)C	pVal_BE(2)C	Delta_HeLa	pVal_HeLa
X5	0.00621278	0.0847236	-0.00105245	0.800735	-0.0081065	0.424293
X27	0.0021276	0.844959	-0.0234557	0.0133019	0.00446909	0.798459
X36	0.00429616	0.700413	-0.0260529	0.03296	0.0107103	0.53703
X38	0.00928117	0.412607	-0.0204306	0.0318737	0.0156258	0.35925
X42	-0.00635297	0.475133	-0.0212061	0.0166318	0.0157501	0.159141
X50	0.0127167	0.423493	-0.0194613	0.0846289	0.0121442	0.537567
X59	0.00994423	0.29987	-0.02056	0.104469	0.00857653	0.647055
X65	0.00964861	0.36216	-0.0218392	0.032825	0.0157393	0.335823
X79	0.00884702	0.479292	-0.0203589	0.0996742	0.0105894	0.54458
X81	0.0114697	0.430375	-0.0203927	0.0450048	0.0095618	0.561215
X84	0.00838821	0.582755	-0.0175896	0.0364636	0.00963384	0.595546
X106	0.0106291	0.376387	-0.0140891	0.014479	0.00801283	0.526018
X135	0.00177872	0.806217	-0.0204325	0.014457	0.0135328	0.438171
X140	0.000233088	0.981533	-0.0152296	0.0273745	0.0160983	0.355617
X152	-0.00121073	0.942873	-0.00529943	0.198179	0.000447069	0.97186
X154	0.00439014	0.77726	-0.0177908	0.0363343	0.0131578	0.513462
X157	-0.0109844	0.40105	-0.0111435	0.262655	0.0124994	0.475152
X161	0.00366024	0.841121	-0.0159358	0.0236173	-0.00306466	0.818236
X173	-0.00292291	0.844428	-0.0157737	0.0429704	-0.00746068	0.706213
X178	0.00267191	0.839289	-0.0138395	0.10693	0.00188095	0.931528
X182	-0.00198553	0.887162	-0.0172436	0.00568373	-0.00597797	0.766361
X189	0.00140929	0.927642	-0.016137	0.101815	-0.000735075	0.97127
X191	0.00371638	0.811218	-0.009142	0.176335	0.00225202	0.905807
X194	0.00609175	0.653599	-0.0154738	0.0683984	0.00585114	0.705243
X203	0.00727144	0.528322	-0.0148544	0.0815777	-0.00361255	0.874395
X210	0.00858667	0.551077	-0.0217142	0.0270703	-0.00186672	0.912248
X215	0.00561179	0.571285	-0.0162723	0.0440952	0.00942837	0.614463
X217	0.00141055	0.897001	-0.0177518	0.0597214	0.00492927	0.783642
X222	-0.00233535	0.847483	-0.0149506	0.0541314	0.000963676	0.951298
X224	0.00340311	0.705129	-0.021061	0.0163455	0.00483357	0.758626
X232	0.00471043	0.737947	-0.0188348	0.00471306	0.0138599	0.369934
X235	-0.00343213	0.779592	-0.0150481	0.0137005	0.00306384	0.885091
X237	-0.00461886	0.679459	-0.0157483	0.06777	0.0047437	0.761523
X239	-0.00395318	0.809566	-0.0157324	0.0285316	0.00288815	0.867002
X244	0.00941157	0.489055	-0.017436	0.0748518	0.00376481	0.848306
X246	0.00915649	0.432733	-0.018218	0.0576828	0.00267421	0.84279
X260	-0.00535067	0.277972	0.00306234	0.752045	-0.000602086	0.922853
			-0.0260529	0.00471306
			-0.00105245

## Sheet: RiboProm2
CpG	Delta_SH-SY5Y	pVal_SH-SY5Y	Delta_BE(2)C	pVal_BE(2)C	Delta_HeLa	pVal_HeLa
X26	0.0115237	0.121346	-0.0293555	0.134003	-0.0246734	0.106068
X30	0.0214033	0.0125618	-0.0253122	0.135991	-0.0129632	0.186222
X35	0.0298324	0.0349628	-0.0275257	0.11888	-0.0212458	0.0792227
X47	0.0284192	0.0174919	-0.0291774	0.122894	-0.0243363	0.0762318
X56	0.020177	0.0351662	-0.0184829	0.237009	-0.011428	0.339631
X76	0.0272308	0.0441112	-0.0293786	0.0976361	-0.019918	0.145427
X81	0.0243025	0.0375618	-0.0253063	0.132975	-0.020943	0.148002
X83	0.0216449	0.0529198	-0.0297394	0.115099	-0.0214063	0.187683
X85	0.0195709	0.0510195	-0.0302263	0.129914	-0.0188176	0.0974016
X88	0.0309421	0.0347006	-0.0288817	0.125919	-0.0271022	0.0805536
X97	0.023277	0.0974522	-0.0268761	0.128542	-0.0195024	0.17472
X100	0.0211671	0.0512236	-0.0334588	0.0917342	-0.0166367	0.230423
X103	0.023179	0.016405	-0.0314323	0.076471	-0.0186574	0.255213
X109	0.0195858	0.0864764	-0.0265529	0.180847	-0.0212857	0.182618
X115	0.0225229	0.0146352	-0.0252135	0.164867	-0.0183968	0.218413
X117	0.022386	0.0747891	-0.0291178	0.118893	-0.0129151	0.230794
X125	0.0146245	0.0351971	-0.0169421	0.33306	-0.0198887	0.229192
X131	0.0242699	0.0627054	-0.0347412	0.0662519	-0.0217046	0.103865
X149	0.0304355	0.0594961	-0.029701	0.088034	-0.0121311	0.446327
X154	0.0301895	0.0703671	-0.0273304	0.114695	-0.012494	0.443955
X159	0.0258407	0.126471	-0.0335415	0.048466	-0.0156084	0.451264
X172	0.0302617	0.17938	-0.0220406	0.26829	-0.0202949	0.290925
X175	0.0226893	0.218419	-0.027124	0.148544	-0.016641	0.339724
X191	0.0327743	0.0432924	-0.0310815	0.115202	-0.00996824	0.606741
X204	0.0299993	0.113533	-0.0307052	0.125361	-0.02061	0.319245
X212	0.031345	0.0835941	-0.0321024	0.113529	-0.0180103	0.395462
	0.0146245	0.0125618
	0.0309421	0.0974522
