# Supplementary material for: Evaluation of DNA Methylation Profiles of LINE-1, Alu and Ribosomal DNA Repeats in Human Cell Lines Exposed to Radiofrequency Radiation
Source: Preprints.org preprint supplement (doi:10.20944/preprints202304.1028.v1), 2023-04-27
Supplement: Supplementary file 3 [file Table S2_Haplotype_Diversity_Statistics.xlsx]

## Sheet: Aplotype_Statistics
	18S1		28S		Alu		LINE-1		RiboProm1		RiboProm2
	delta	pvalue	delta	pvalue	delta	pvalue	delta	pvalue	delta	pvalue	delta	pvalue
SH-SY5Y	0.572075	0.223001	0.0684476	0.550459	0.0625483	0.0992604	0.177313	0.0517408	-0.139781	0.316932	0.235151	0.175246
BE(2)C	0.0396911	0.826544	-0.129438	0.0257409	-0.048465	0.513877	0.00839269	0.9432	-0.107971	0.0781452	-0.265202	0.0231646
HeLa	0.006424	0.919148	0.0655649	0.423672	0.0454254	0.550113	0.142187	0.0107282	0.0377405	0.901346	0.114008	0.0736667
