# Supplementary material for: Evaluation of DNA Methylation Profiles of LINE-1, Alu and Ribosomal DNA Repeats in Human Cell Lines Exposed to Radiofrequency Radiation
Source: Preprints.org preprint supplement (doi:10.20944/preprints202304.1028.v1), 2023-04-27
Supplement: Supplementary file 4 [file supplementary]

**>18S1**

4 24 30 45 52  
TAGCCGTTTCTCAGGCTCCCTCTCCGGAATCGAACCCTGATTCCCCGTCACCCTGGTCACCATGGTAGGCA  
72 75 85 104 108 117 120 123 128 135 139  
CGGCGACTACCATCGAAAGTTGATAGGGCAGACGTTCGAATGGGTCTCGCCGCCACGGGGGGCGTGCAG  
143 148 173 176 179 183 190 194 200  
TCGGCCCGAGGTTATCTAGAGTCACCAAAGCCGCCGCGCCCGCCCCCGGCCCGGGGCGCGAGAGGGGCT  
215 242  
GACCGGGTTGGTTTGTATCTGATAAATGCACG

**>28S**

29 56 62  
GTATTTAGCCTTAGATGGAGTTTACCACCCTTTGGGCTGCATTCCCAAGCAACCCGACTCCGGAAGACC  
72 78 81 83 86 93 99 110 116 128  
CGGGCCCGGCGCGCGGGGGCCGCTACCGGCCTCACACCGTCCACGGCTGGGCCTCGATCAGAAGGACT  
153 157 160 163 170 179 183 195 197 202 205 207  
TGGGCCCCCAGAGCGGCGCGGGGAGCGGGTCTTCGTACCGCCACATGTCCCGCGCCCCCGCGCGGGG  
212 220 223 246 249  
CGGGGATTCGGCGCTGGGCTCTTCCTGTTCACTCGCGTTACTGAGGGAATCCTGGTTAGTT

**>Alu**

26 30 38 40 42 62  
TCTCTACTAAAAATACAAAAATTAGCCGGGCGTGGTGGCGCGCGCCTGTAATCCAGCTACTCGGGAGGCT  
84 94 101 118 124 126  
GAGGCAGGAGAATCGCTTGAACC CGGGAGGCGGAGGTTGCAGTGAGCCGAGATCGCGCCACTGCACTCC  
AGCCTGG

**>LINE-L1**

27. 34. 37 49 61 70  
CTCTGAGCCAGGTGTGGGATATAGTCTCGTGGTGCGCCGTTTCTTAAGCCGCTGTAAGCGCAATATTC  
85 99 103 123  
GGGTGGGAGTGACCCGATTTTCCAGGTGCGTCGTCACCCCTTTCTTTGACTCGGAAAGGGAACTCCCTGA  
149 173 183 188 190 194 199  
CCCCTTGCGCTTCCCAGGTGAGGCAATGCCTCGCCCTGCTTCGGCTCGCGCACCGGTGCGCACACACTGG  
217  
CCTGCGCCCACTGTCTGGCACTCCCTAGTGAG

**>RiboProm1**

5 27 36 38 42 50 59 65  
GTCCCCTGTGTAGCTAGGCAGAGCTCCGGAAGCCCGCGGTCTCAGCCCGGCTGGCCCGGTGGCGCCA  
79 81 84 106 135  
GAGCTGTGGCGCGTCTTGTGAGTCACAGCTCTGGCGTGCAGGTTTATGTGGGGGAGAGGCTGTCTGCTG  
140 152 154 157 161 173 178 182 189 191 194 203  
CGCTTCTGGGCCCGCGGCGGGCGTGGGGCTGCCCGGGCCGCGTCCGACCAGCGCGCGTAGCTCCCGAGGCC  
210 215 217 222 224 232 232 235 237 244 246 260  
CGAGCCCGCGACCCCGCGGGGACCCGCGCGCGTGGCGCGGGAGGCTGGGGAAGCCCTTCC

**>RiboProm2**

GTGTCCTTGGGTTGACCAGAGGGCCC<sup>26</sup>CG<sup>30</sup>GG<sup>35</sup>CGCTC<sup>47</sup>CGTGTGTGGCTG<sup>56</sup>CGATGGTGG<sup>56</sup>CGTTTTTGGGGACA  
GGTGT<sup>76</sup>CG<sup>81</sup>TGT<sup>83</sup>CG<sup>85</sup>CG<sup>88</sup>CGCCTGGGC<sup>97</sup>CG<sup>100</sup>CG<sup>103</sup>GCGTGGT<sup>109</sup>CGGTGA<sup>115</sup>CG<sup>117</sup>CGACCTCC<sup>125</sup>CG<sup>131</sup>GGGGGAG  
GTATATCTTT<sup>149</sup>CG<sup>154</sup>CTC<sup>159</sup>CGAGT<sup>172</sup>CG<sup>175</sup>GCATTTTGGGCC<sup>172</sup>CG<sup>175</sup>GGTTATTGCTGACA<sup>191</sup>CGCTGTCCTCTGG<sup>204</sup>CGACCTG  
<sup>212</sup>  
T<sup>212</sup>CGCTGGAGAGGTTGGGCCTTGGGATG
