# Supplementary material for: Evaluation of DNA Methylation Profiles of LINE-1, Alu and Ribosomal DNA Repeats in Human Cell Lines Exposed to Radiofrequency Radiation
Source: Preprints.org preprint supplement (doi:10.20944/preprints202304.1028.v1), 2023-04-27
Supplement: Supplementary file 4 [file Table S3_PrimerSequence.xlsx]

## Sheet: Foglio1
Amplicon ID	Forward Primer	Reverse Primer
LINE L1	TTTTGAGTTAGGTGTGGGATA	CTCACTAAAAAATACCAAACAA
Alu	TTTTTATTAAAAATATAAAAATTAGT	CCAAACTAAAATACAATAA
RiboProm1	GTTTTYGTTGTGAGTTAGGTAGAGTTT	AAAAAAACRTCCCCAACCTCC
RiboProm2	GTGTTTTTGGGTTGATTAGAGG	CATCCCAAAACCCAACCTCTCC
18S	TAGTYGTTTTTTAGGTTTTT	CRTACATTTATCAAATCAAA
28S	GTATTTAGTTTTAGATGGAGTTTATT	AACTAACCAAAATTCCCTCA
