# Supplementary figures and images for: Evaluation of DNA Methylation Profiles of LINE-1, Alu and Ribosomal DNA Repeats in Human Cell Lines Exposed to Radiofrequency Radiation
Source: Preprints.org preprint supplement (doi:10.20944/preprints202304.1028.v1), 2023-04-27

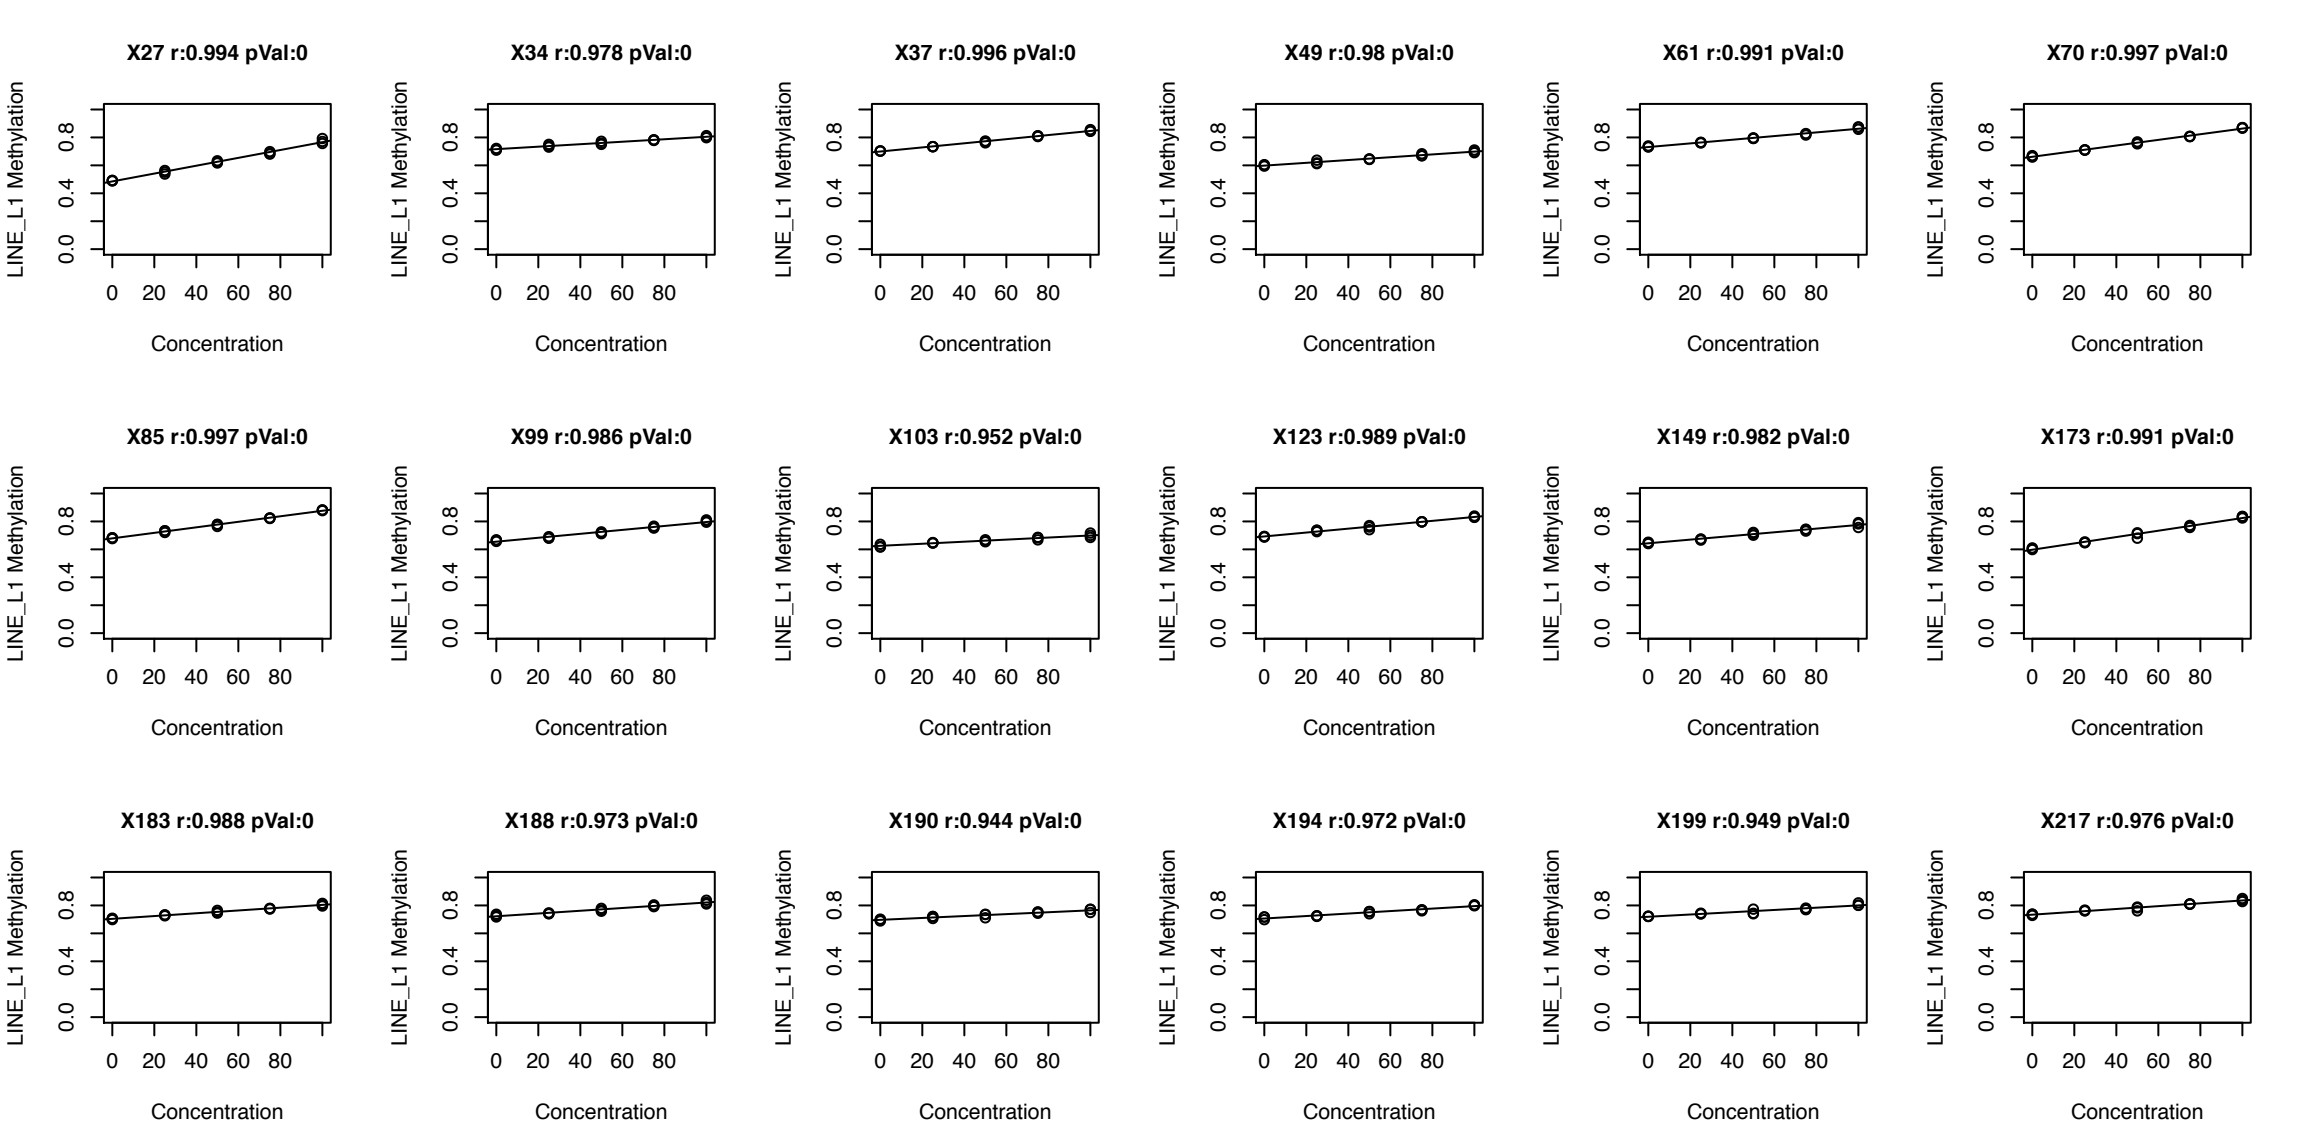

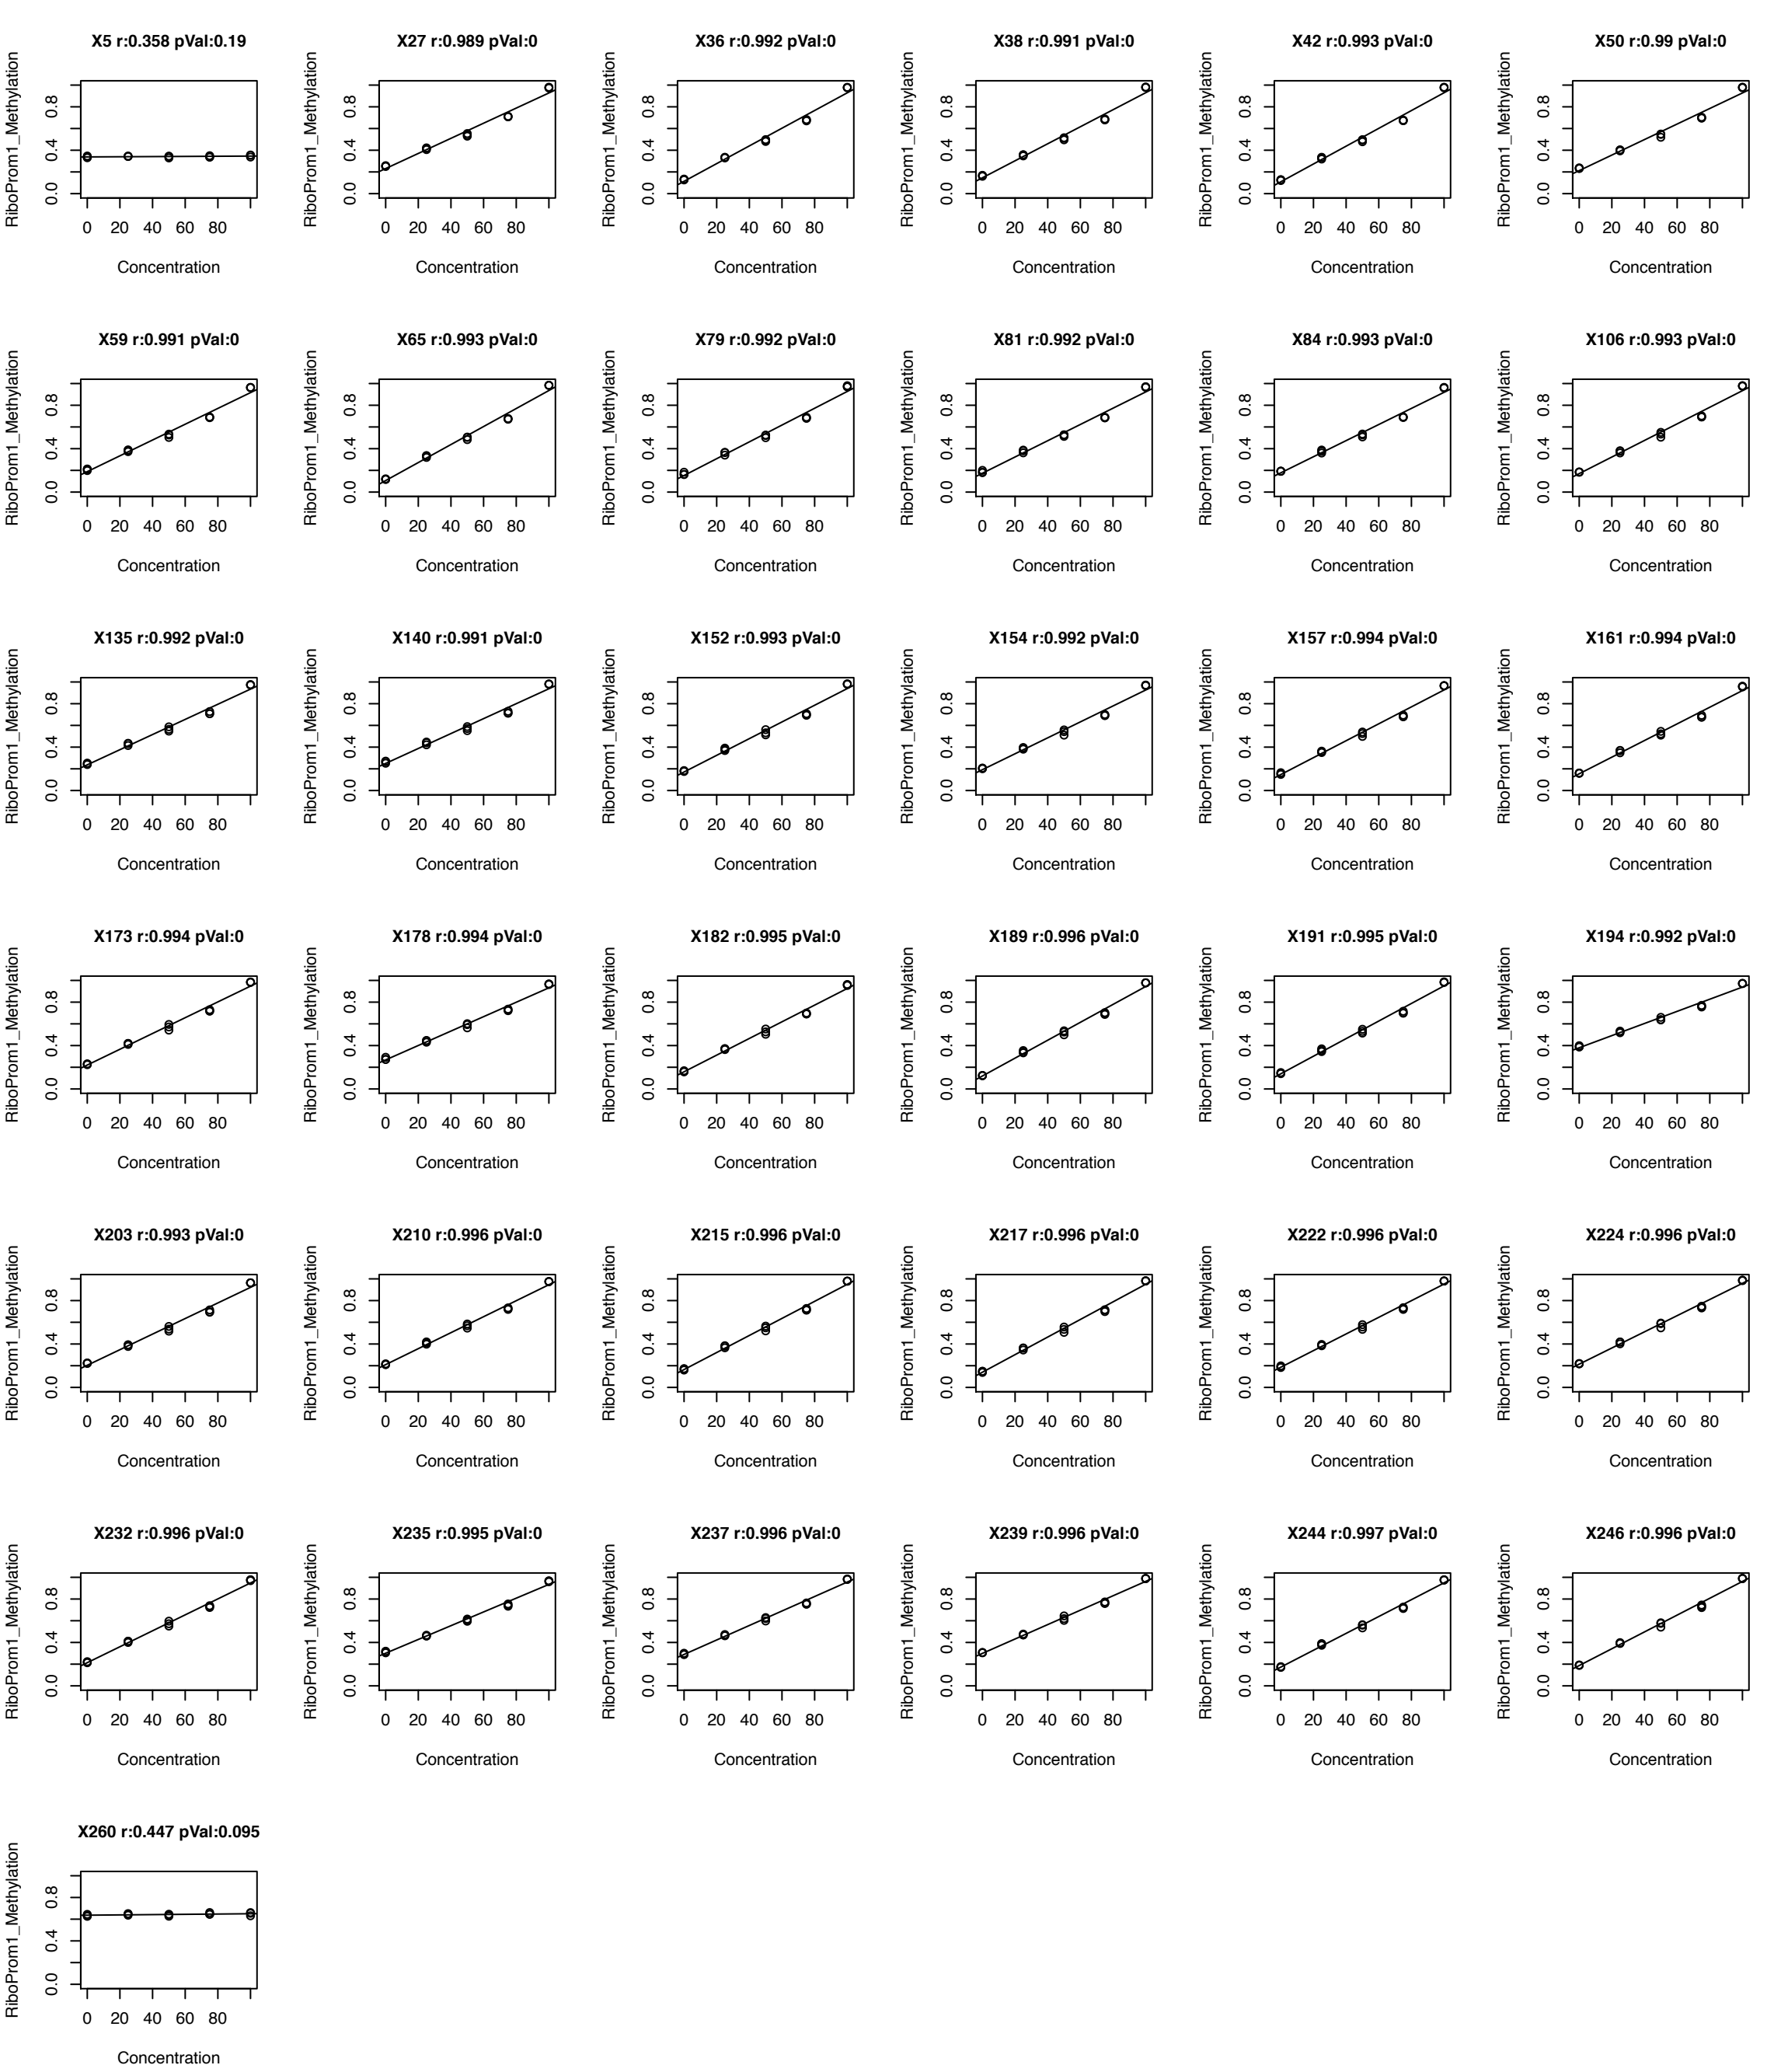



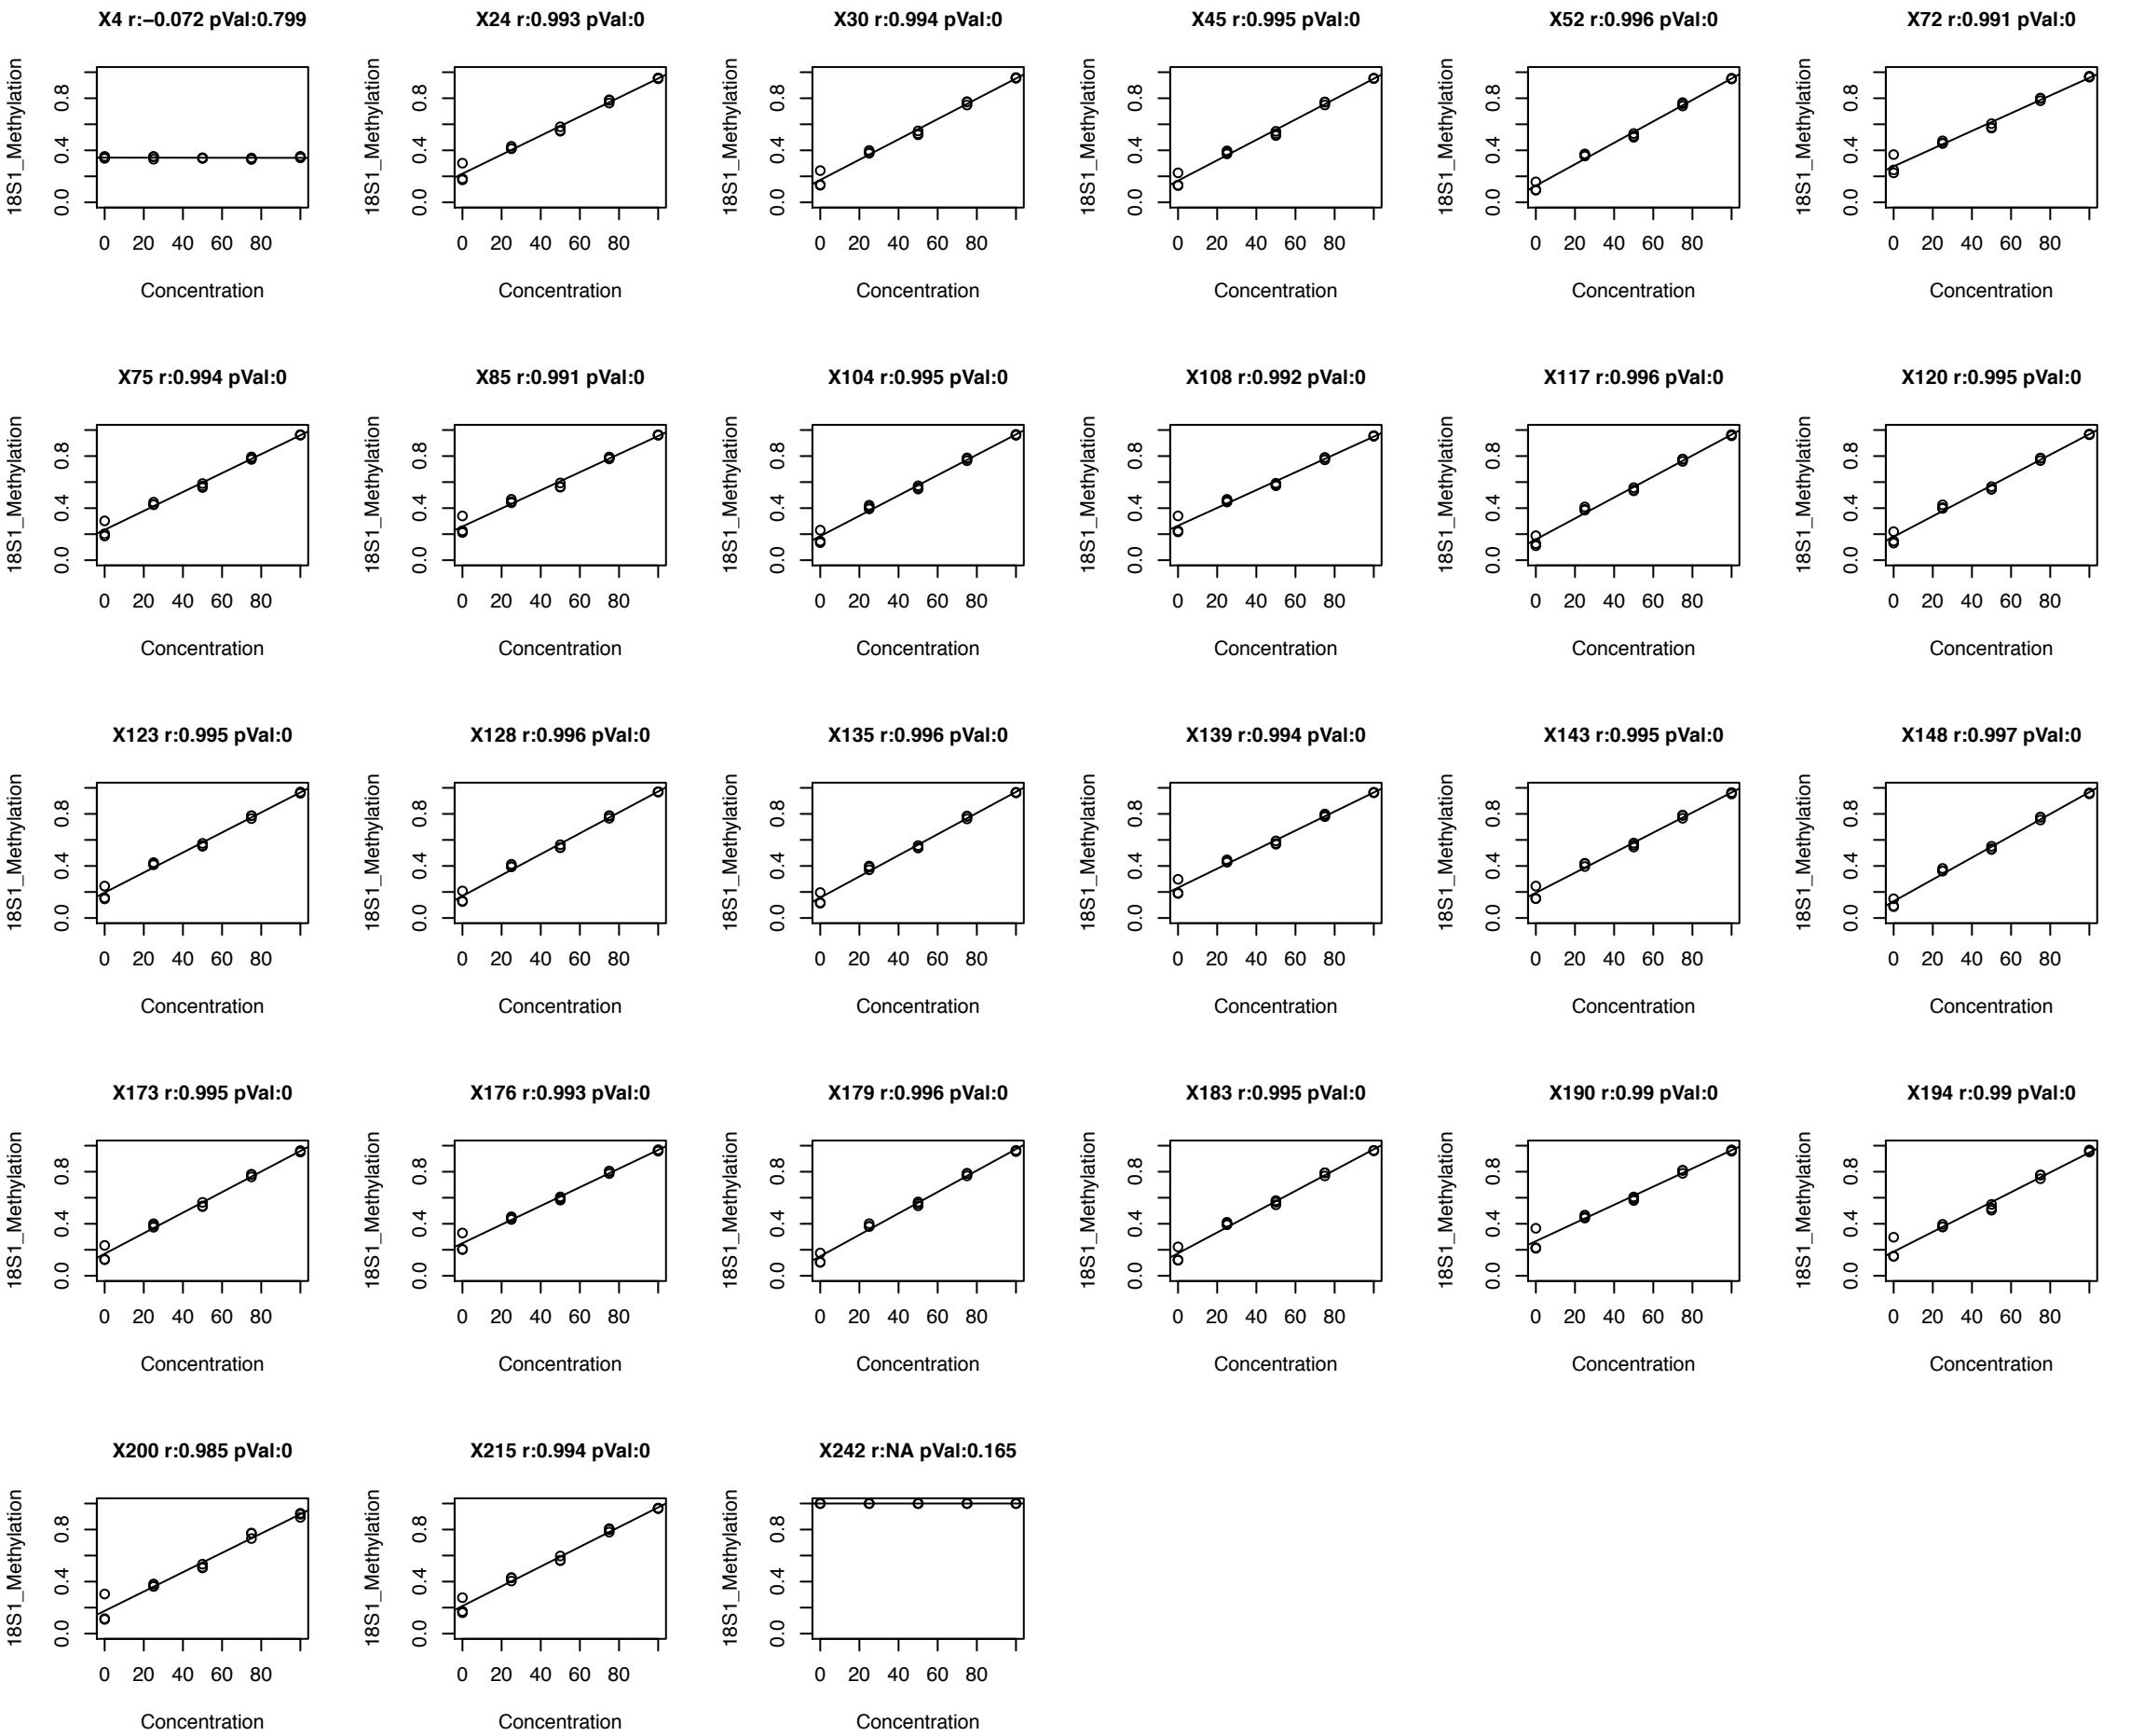

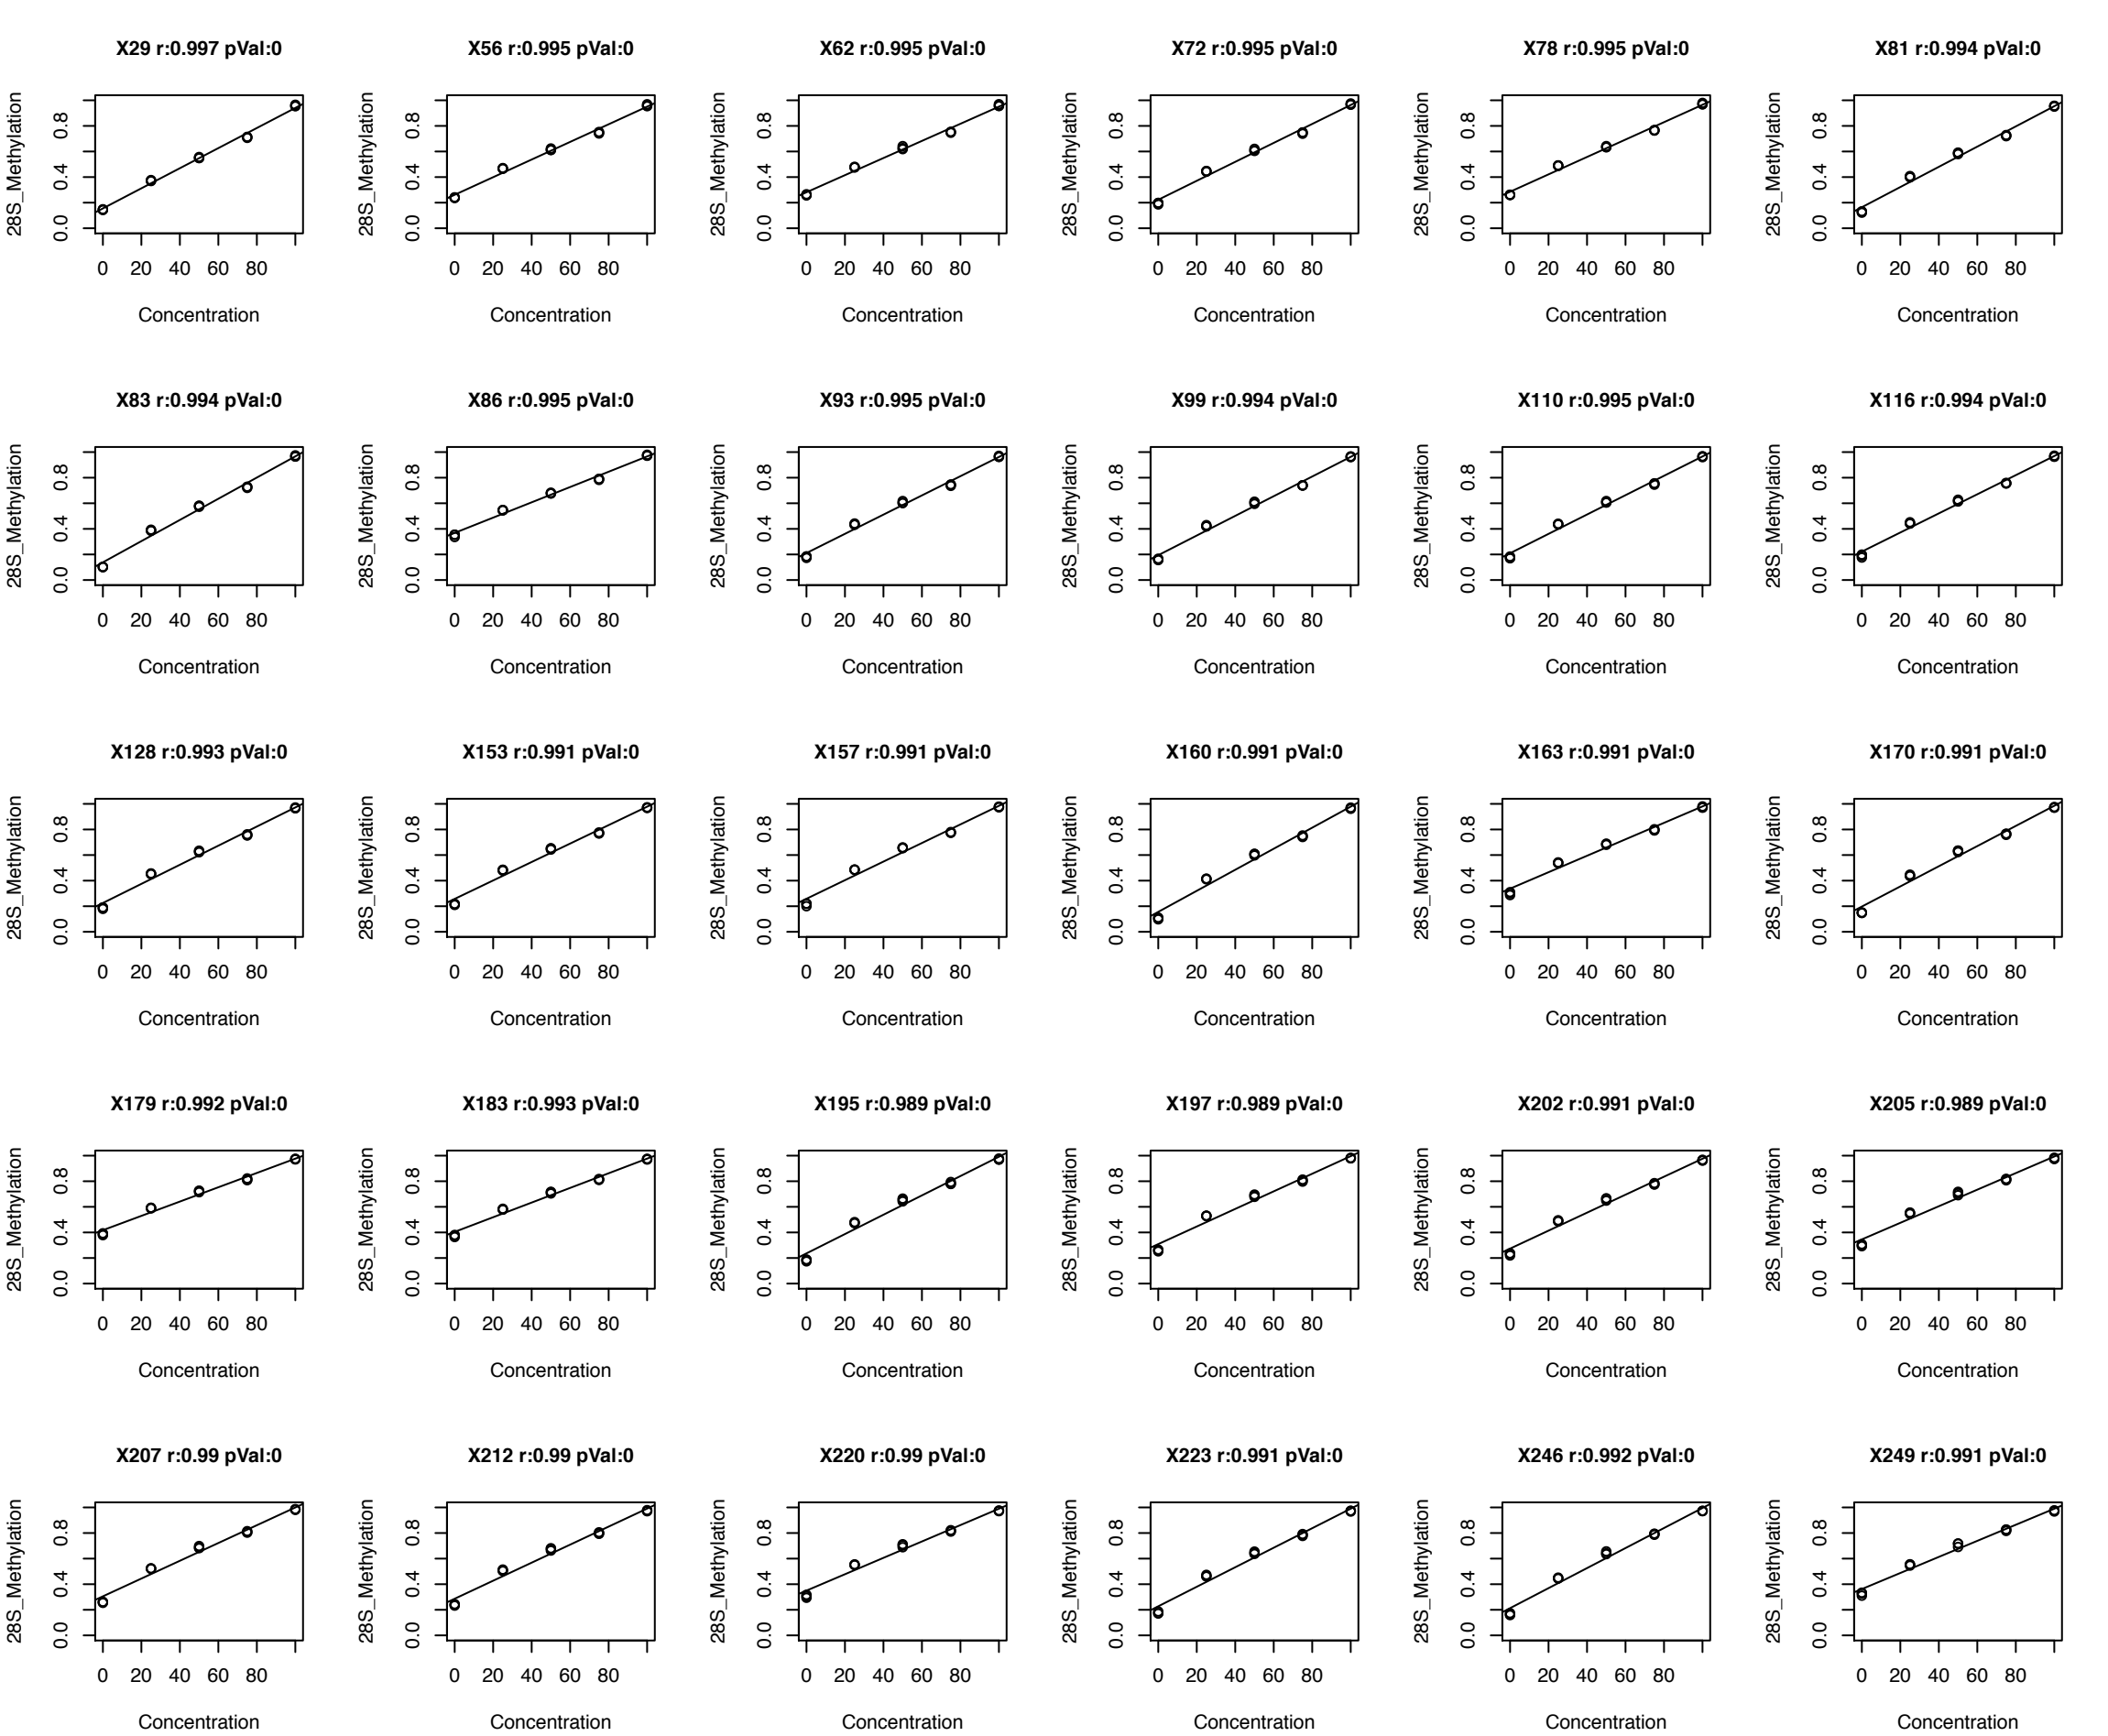

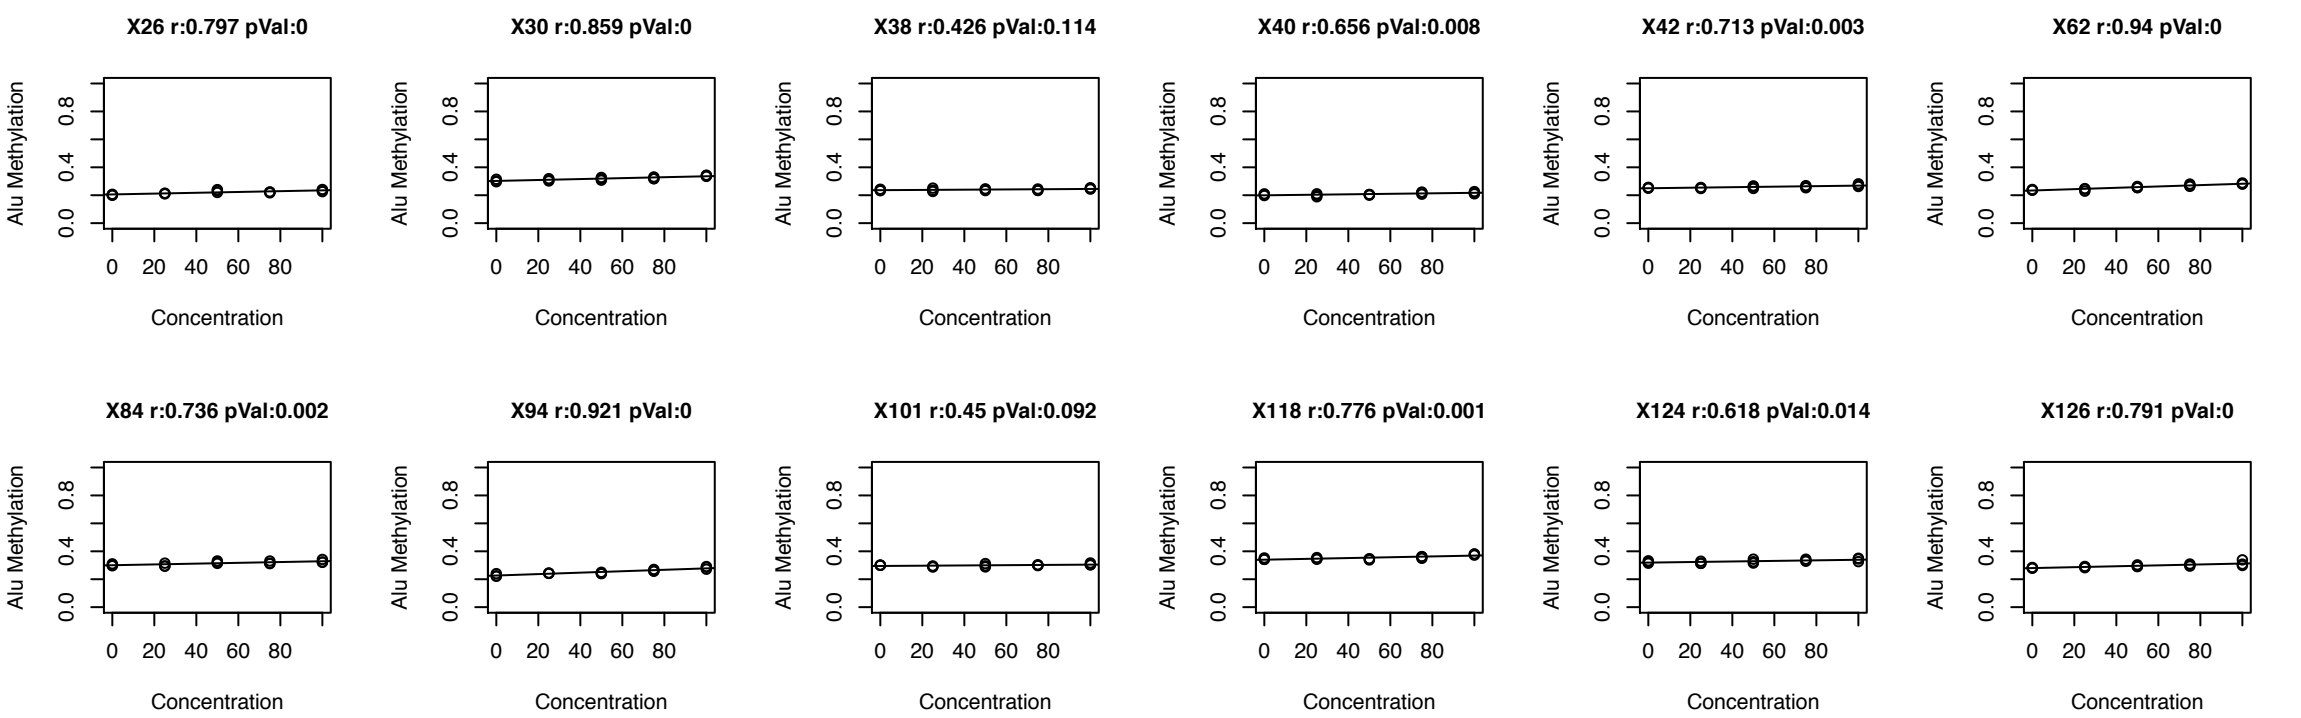

Supplement: Supplementary file 2 [file supplementary]
